# Supplementary material for: Synthesis of a water-soluble bis(m-phenylene)-32-crown-10-based cryptand and its pH-responsive binding to a paraquat derivative
Source: Royal Society of Chemistry journal article supplement (doi:10.1039/c2cc38472h), 2012-12-19
Supplement: c2cc38472h.pdf [file c2cc38472h.pdf]

## Synthesis of a water-soluble bis(*m*-phenylene)-32-crown-10-based cryptand and its pH-responsive binding to a paraquat derivative

Xiaofan Ji, Mingming Zhang, Xuzhou Yan, Jinying Li and Feihe Huang\*

*MOE Key Laboratory of Macromolecular Synthesis and Functionalization, Department of Chemistry, Zhejiang  
University, Hangzhou, Zhejiang 310027, P. R. China,*

Fax and Tel: +86-571-8795-3189; Email address: fhuang@zju.edu.cn.

### Electronic Supplementary Information (16 pages)

|                                                                                               |     |
|-----------------------------------------------------------------------------------------------|-----|
| 1. <i>Materials and methods</i>                                                               | S2  |
| 2. <i>Synthesis of compound 1</i>                                                             | S3  |
| 3. <i>Synthesis of compound 2</i>                                                             | S6  |
| 4. <i>Job plots of 1↷3 and 2↷3 based on UV-Vis data in H<sub>2</sub>O</i>                     | S8  |
| 5. <i>Determination of association constants of 1↷3 and 2↷3</i>                               | S9  |
| 6. <i>Electrospray ionization mass spectra of 1 and 3, and 2 and 3 in H<sub>2</sub>O</i>      | S11 |
| 7. <i>Partial NOESY NMR spectra of 1 and 3, and 2 and 3 in D<sub>2</sub>O</i>                 | S13 |
| 8. <i>Partial <sup>1</sup>H NMR spectra of the pH-controlled complexation between 2 and 3</i> | S14 |
| 9. <i>COSY and NOESY NMR spectra of 1 in D<sub>2</sub>O</i>                                   | S14 |

### *1. Materials and methods*

All reagents were commercially available and used as supplied without further purification. Compounds **4**<sup>S1</sup> and **6**<sup>S1</sup> were synthesized by published literature procedures. Compound **5** was purchased from J&K. <sup>1</sup>H NMR spectra were collected on a temperature-controlled 400 MHz or 500 MHz spectrometer. <sup>13</sup>C NMR spectra were recorded on a Bruker AVANCE DMX-400 or DMX-500 spectrometer. Low-resolution electrospray ionization mass spectra (LRESI-MS) were obtained on a Bruker Esquire 3000 plus mass spectrometer (Bruker-Franzen Analytik GmbH Bremen, Germany) equipped with an ESI interface and an ion trap analyzer. High-resolution electrospray ionization mass spectra (HRESI-MS) were obtained on a Bruker 7-Tesla FT-ICR mass spectrometer equipped with an electrospray source (Billerica, MA, USA). The melting points were collected on a SHPSIC WRS-2 automatic melting point apparatus.

## 2. Synthesis of compound **1**

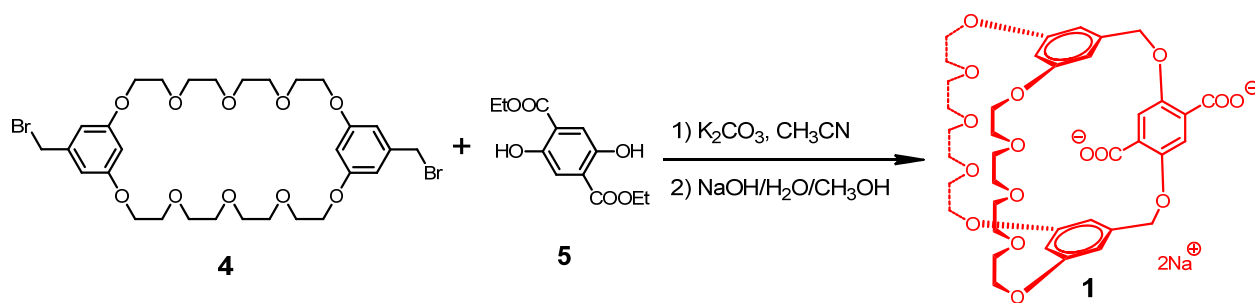

A mixture of **4** (180 mg, 0.250 mmol), **5** (64.0 mg, 0.250 mmol) and  $CH_3CN$  (50 mL) was prepared. This mixture was added *via* a syringe pump at 1 mL/h to a suspension containing  $K_2CO_3$  (345 mg, 2.50 mmol) in  $CH_3CN$  (250 mL) at reflux under nitrogen gas protection. After complete addition, the mixture was stirred at reflux for 5 days. Potassium carbonate was filtered off and  $CH_3CN$  were removed with a rotaevaporator. The residue was dissolved in  $CH_2Cl_2$  and washed with water. Removal of  $CH_2Cl_2$  followed by column chromatography (petroleum ether/ethyl acetate, 1:1 *v/v*) afforded a white solid. The white solid (130 mg) was dissolved in  $CH_3OH$  (50 mL), then a saturated aqueous solution of  $NaOH$  (50 mL) was added. The mixture was stirred at reflux for 1 day. Removal of solvents followed by column chromatography ( $CH_3OH$ ) afforded a white solid which was washed by water to remove  $NaOH$ , and vacuum dried (120 mg, 60%). Mp: 118.6–120.2 °C. The maximum concentration of **1** in water: 5.00 mM. The  $^1H$  NMR spectrum of **1** is shown in Fig. S1.  $^1H$  NMR (400 MHz,  $D_2O$ , 298 K)  $\delta$  (ppm): 6.92 (2H, s), 6.46 (4H,  $J = 2.1$  Hz, d), 6.20 (2H,  $J = 2.1$  Hz, t), 5.05 (4H, s), 3.95–3.75 (8H, m), 3.70–3.60 (8H, m), 3.55–3.45 (16H, m). The  $^{13}C$  NMR spectrum of **1** is shown in Fig. S2.  $^{13}C$  NMR (125 MHz, DMSO, 298 K)  $\delta$  (ppm): 171.15, 147.58, 141.34, 133.72, 115.40, 105.61, 101.06, 70.31, 70.12, 69.29, 68.82, 67.38. LRESIMS is shown in Fig. S3:  $m/z$  757.3  $[M - 2Na + H]^-$  (100%). HRESIMS:  $m/z$  calcd for  $[M - Na]^- C_{38}H_{44}NaO_{16}^-$ , 779.2533; found 779.2512; error  $-2.7$  ppm.

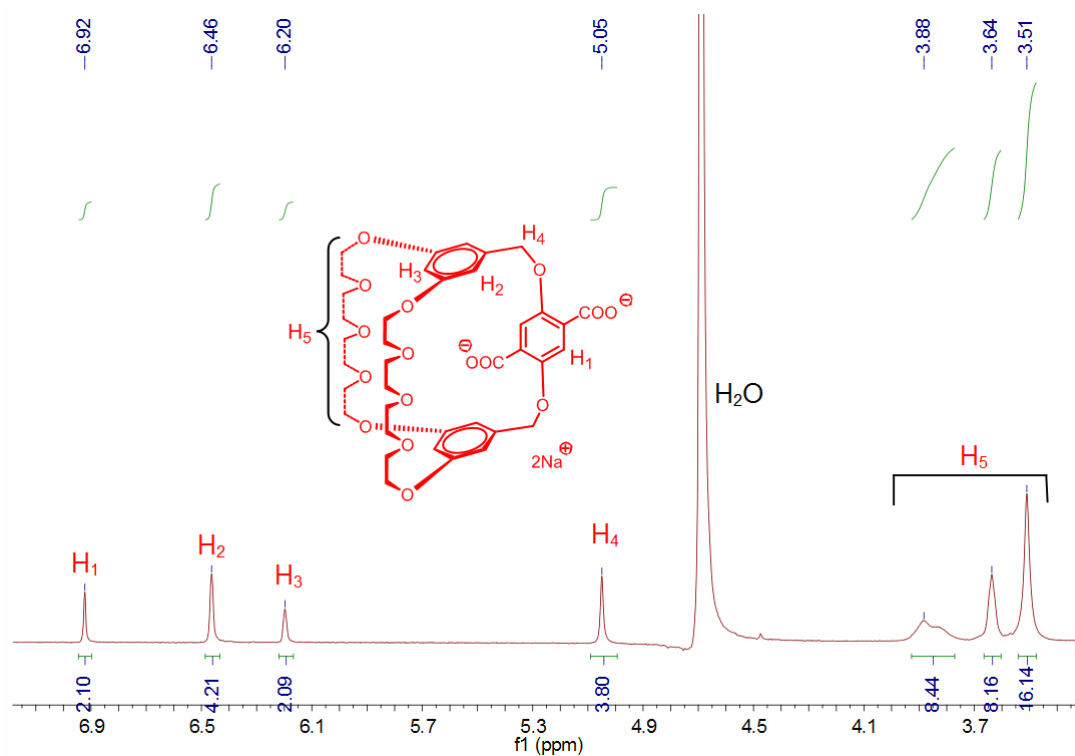

**Fig. S1** <sup>1</sup>H NMR spectrum (400 MHz, D<sub>2</sub>O, 298K) of **1**.

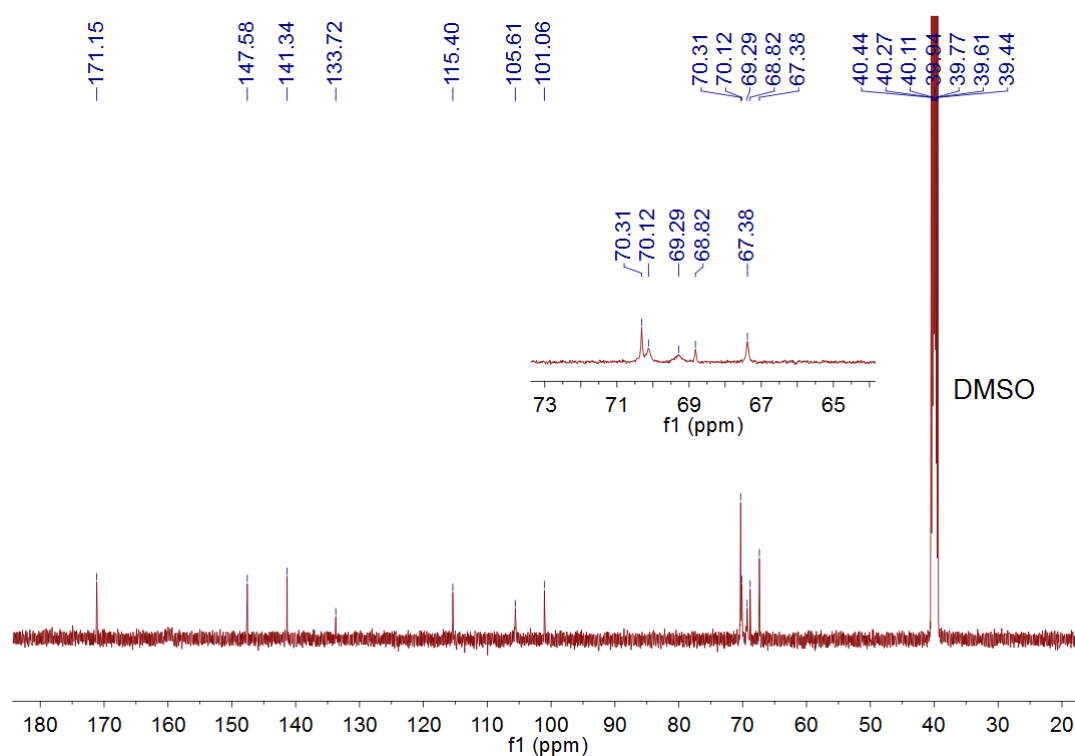

**Fig. S2** <sup>13</sup>C NMR spectrum (125 MHz, DMSO, 298K) of **1**.

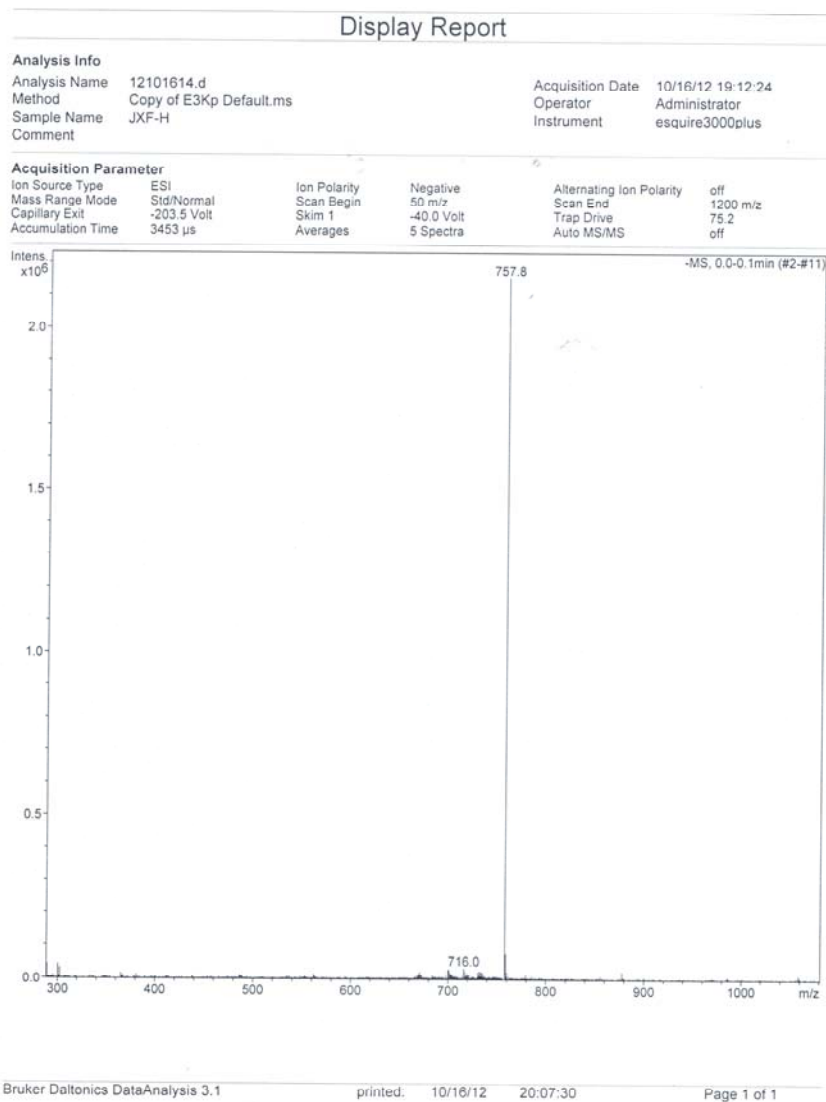

**Fig. S3** LRESI mass spectrum of **1**.

### 3. Synthesis of compound **2**

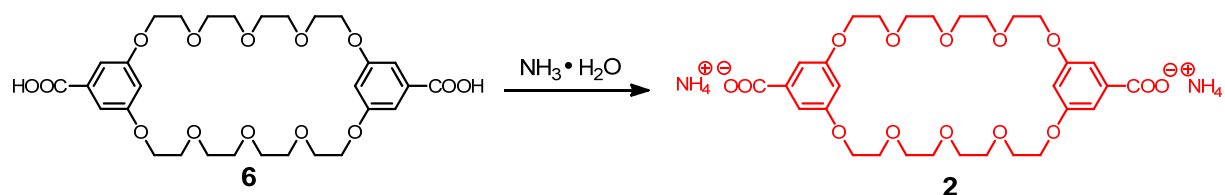

A mixture of **6** (0.630 g, 1.01 mmol) and  $\text{NH}_3 \cdot \text{H}_2\text{O}$  (25 mL, 14 M) was stirred at room temperature for 2 h. The solvent was evaporated under reduced pressure and the residue was dried in vacuum. The product was obtained as a white solid (0.66 g, 99%). Mp: 118.0–120.1 °C. The  $^1\text{H}$  NMR spectrum of **2** is shown in Fig. S4.  $^1\text{H}$  NMR (400 MHz,  $\text{D}_2\text{O}$ , 298 K)  $\delta$  (ppm): 6.88 (4H, s), 6.45 (2H, s), 3.95–3.88 (8H, m), 3.69–3.62 (8H, m), 3.57–3.49 (16H, m). The  $^{13}\text{C}$  NMR spectrum of **2** is shown in Fig. S5.  $^{13}\text{C}$  NMR (125 MHz, DMSO, 298 K)  $\delta$  (ppm): 168.76, 159.55, 138.71, 107.82, 104.14, 70.46, 70.43, 69.34, 67.72. LRESIMS is shown in Figure S6:  $m/z$  623.2  $[\text{M} - 2\text{NH}_4 + \text{H}]^-$  (100%). HRESIMS:  $m/z$  calcd for  $[\text{M} - 2\text{NH}_4 + \text{H}]^-$   $\text{C}_{30}\text{H}_{39}\text{NO}_{14}^-$ , 623.2351; found 623.2307; error  $-7.1$  ppm.

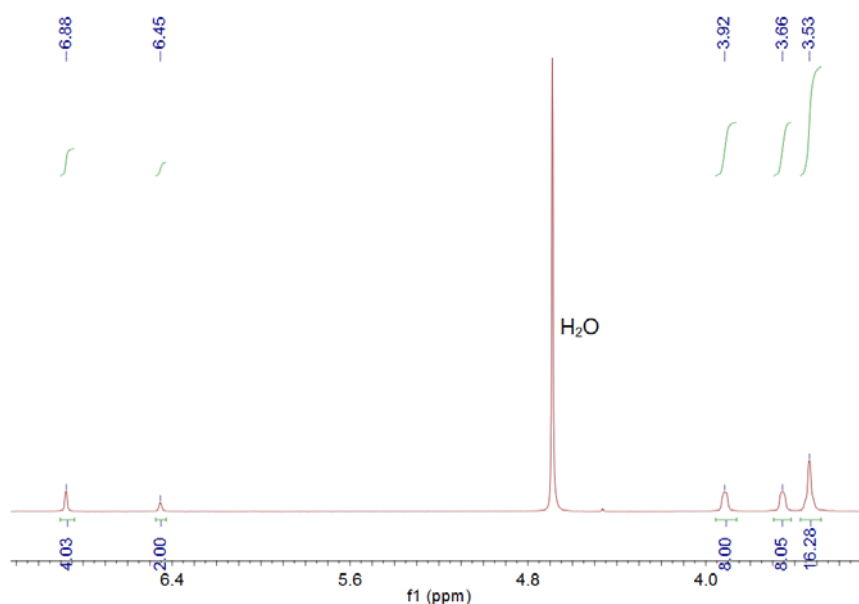

Fig. S4  $^1\text{H}$  NMR spectrum (400 MHz,  $\text{D}_2\text{O}$ , 298K) of **2**.

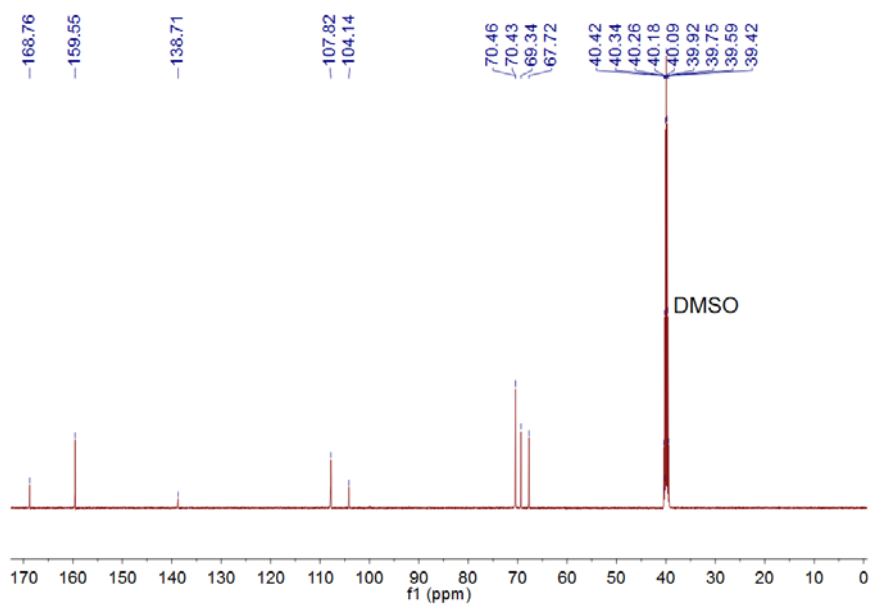

**Fig. S5**  $^{13}\text{C}$  NMR spectrum (125 MHz, DMSO, 298K) of **2**.

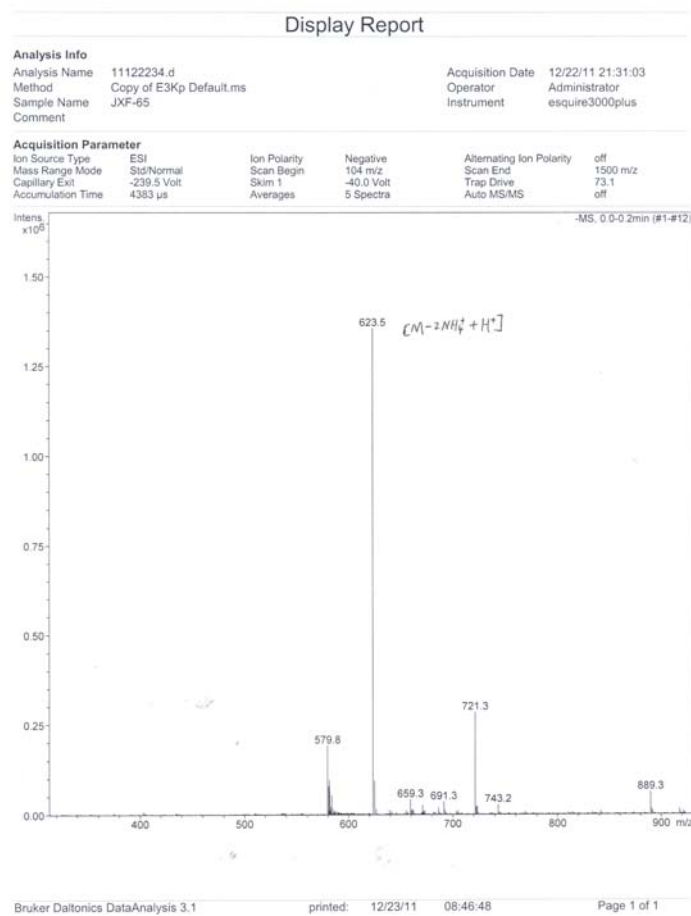

**Fig. S6** LRESI mass spectrum of **2**.

4. Job plots of **1**⇌**3** and **2**⇌**3** based on UV-Vis data in H<sub>2</sub>O

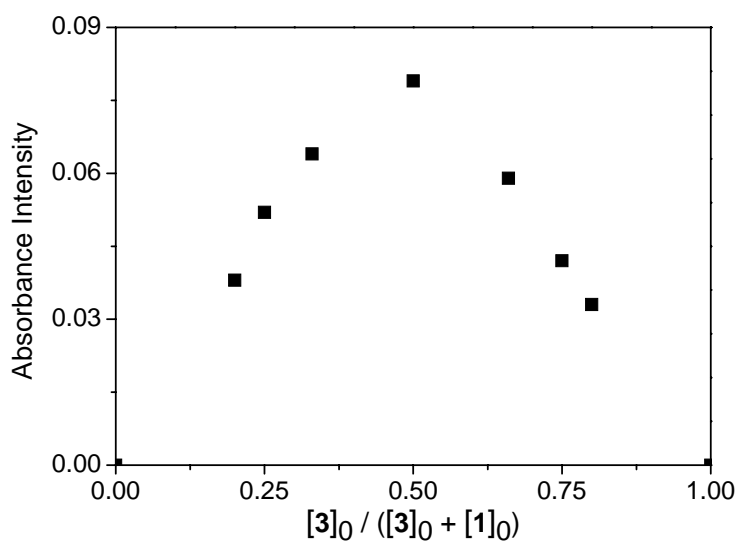

**Fig. S7** Job plot showing the 1:1 stoichiometry of the complexation between **1** and **3** in H<sub>2</sub>O.  $[1]_0 + [3]_0 = 0.500$  mM.  $[1]_0$  and  $[3]_0$  are the initial concentrations of **1** and **3**, respectively.

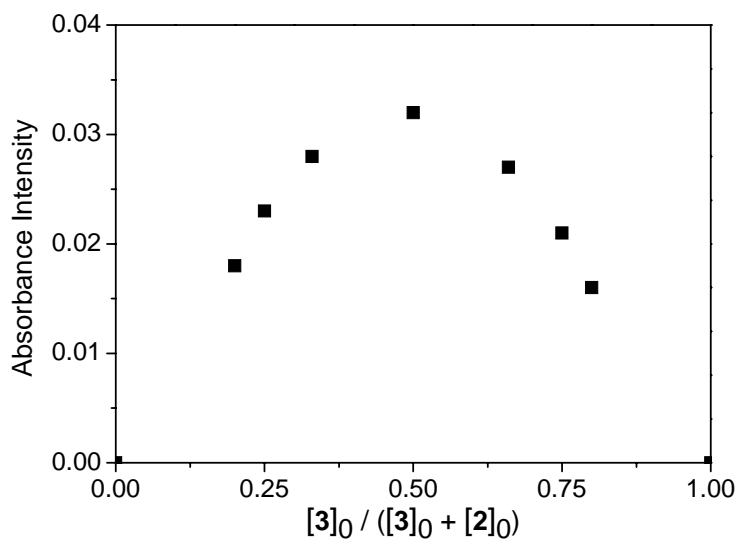

**Fig. S8** Job plot showing the 1:1 stoichiometry of the complexation between **2** and **3** in H<sub>2</sub>O.  $[2]_0 + [3]_0 = 0.500$  mM.  $[2]_0$  and  $[3]_0$  are the initial concentrations of **2** and **3**, respectively.



### 5. Determination of association constants of **1**⊃**3** and **2**⊃**3**<sup>S2</sup>

The association constants of complexes **1**⊃**3** and **2**⊃**3** were determined by probing the charge-transfer band of the complexes by UV-Vis spectroscopy and employing a titration method. Progressive addition of a water solution with high guest **3** concentration (10.0 mM) and low host **1** or **2** concentration (1.00 mM) to a water solution (pH = 7.0, 298 K) with the same concentration of host **1** or **2** resulted in an increase of the intensity of the charge-transfer band of the complex. Treatment of the collected absorbance data at  $\lambda = 380$  nm with a non-linear curve-fitting program afforded the corresponding association constants ( $K_a$ ):  $2.0 (\pm 0.4) \times 10^4 \text{ M}^{-1}$  for **1**⊃**3**, and  $1.7 (\pm 0.1) \times 10^3 \text{ M}^{-1}$  for **2**⊃**3**.

The non-linear curve-fitting (Origin 7.5 program) was based on the equation:

$$A = (A_\infty/[H]_0) (0.5[G]_0 + 0.5([H]_0 + 1/K_a) - (0.5 ([G]_0^2 + (2[G]_0(1/K_a - [H]_0) + (1/K_a + [H]_0)^2)^{0.5})) \quad (\text{Eq. S1})$$

Where  $A$  is the absorption intensity of the charge-transfer band ( $\lambda = 380$  nm) at  $[G]_0$ ,  $A_\infty$  is the absorption intensity of the charge-transfer band ( $\lambda = 380$  nm) when the host is completely complexed,  $[H]_0$  is the fixed initial concentration of the host, and  $[G]_0$  is the initial concentration of the guest.

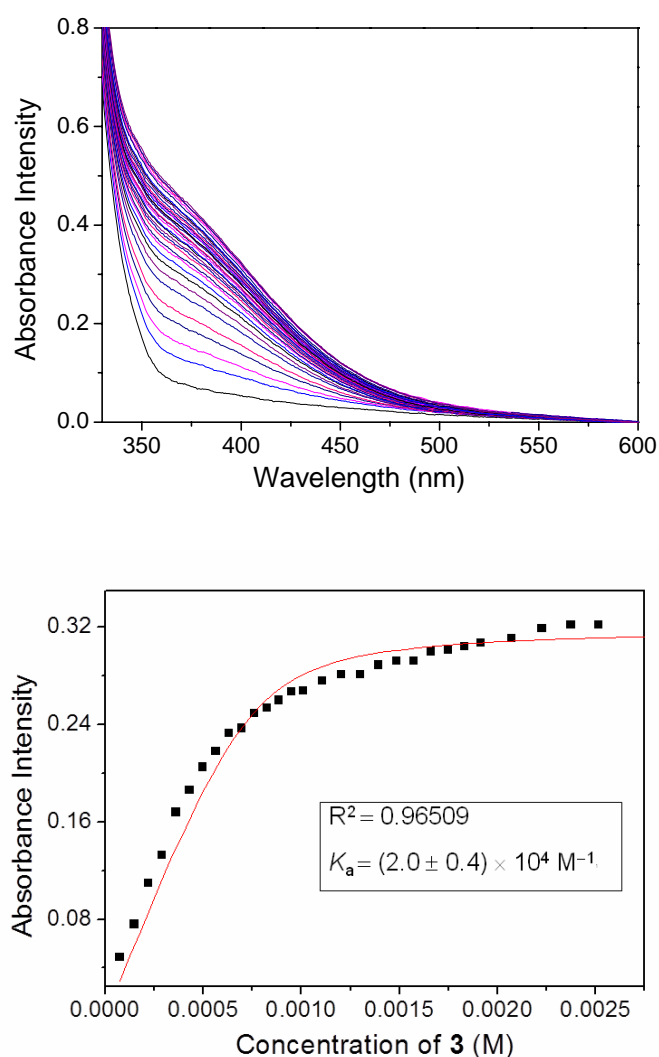

**Fig. S9** Titration curve (top) and non-linear fitting curve (bottom) of host **1** and guest **3**.

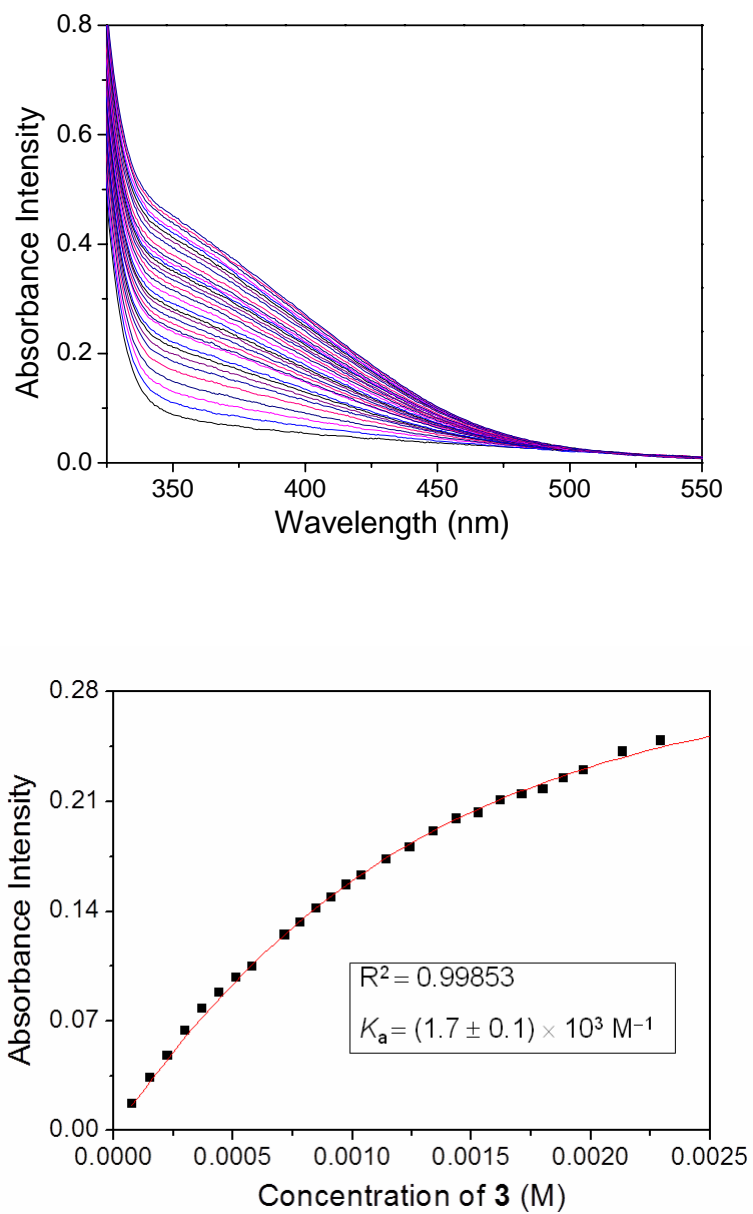

**Fig. S10** Titration curve (top) and non-linear fitting curve (bottom) of host **2** and guest **3**.

## 6. Electrospray ionization mass spectra of **1** and **3**, and **2** and **3** in H<sub>2</sub>O

Print Date: 16 Oct 2012 21:32:18

### Spectrum 1A Plot - 2012-10-16 21:32

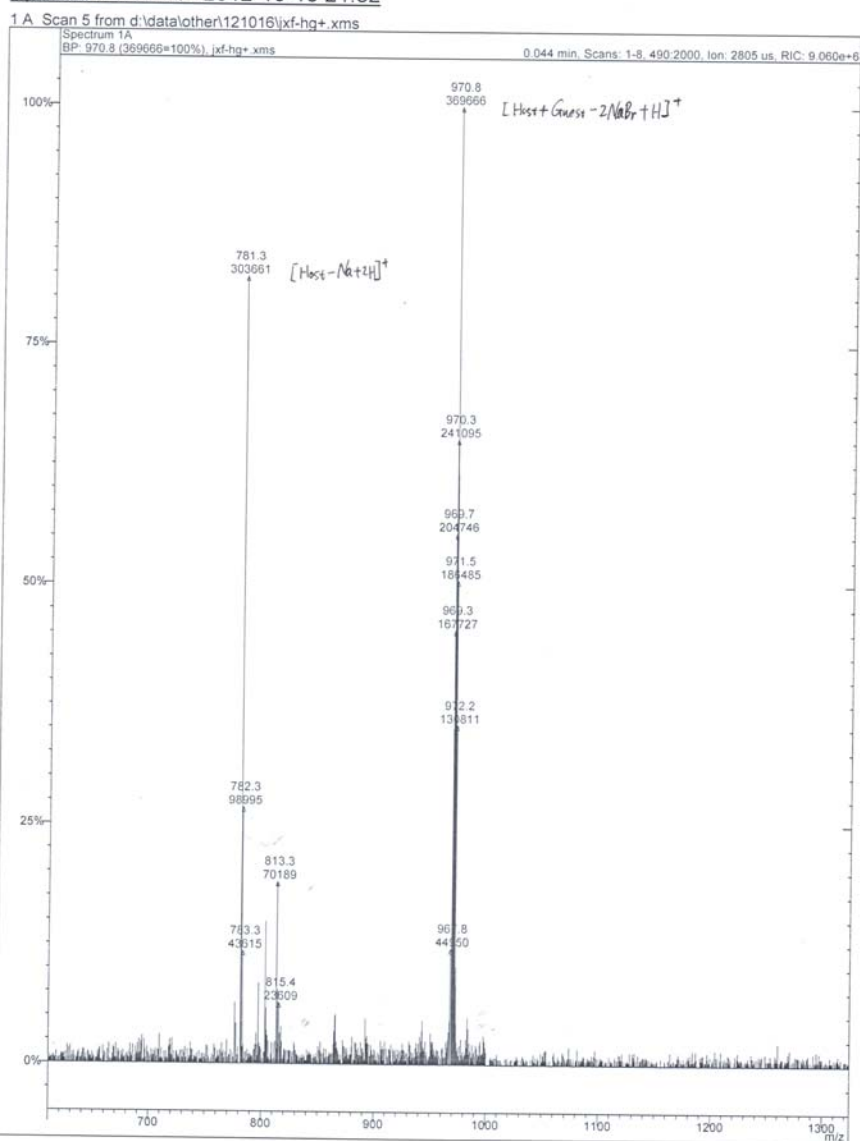

**Fig. S11** Positive electrospray ionization mass spectrum of **1** and **3** in H<sub>2</sub>O, giving strong mass fragments at  $m/z$  970.8 (100%) and 781.3 (82.5%), corresponding to  $[1-3 - 2Na - 2Br + H]^+$  and  $[1 - Na + 2H]^+$ , respectively.

Print Date: 18 Oct 2012 20:47:48

Spectrum 1A Plot - 2012-10-18 20:47

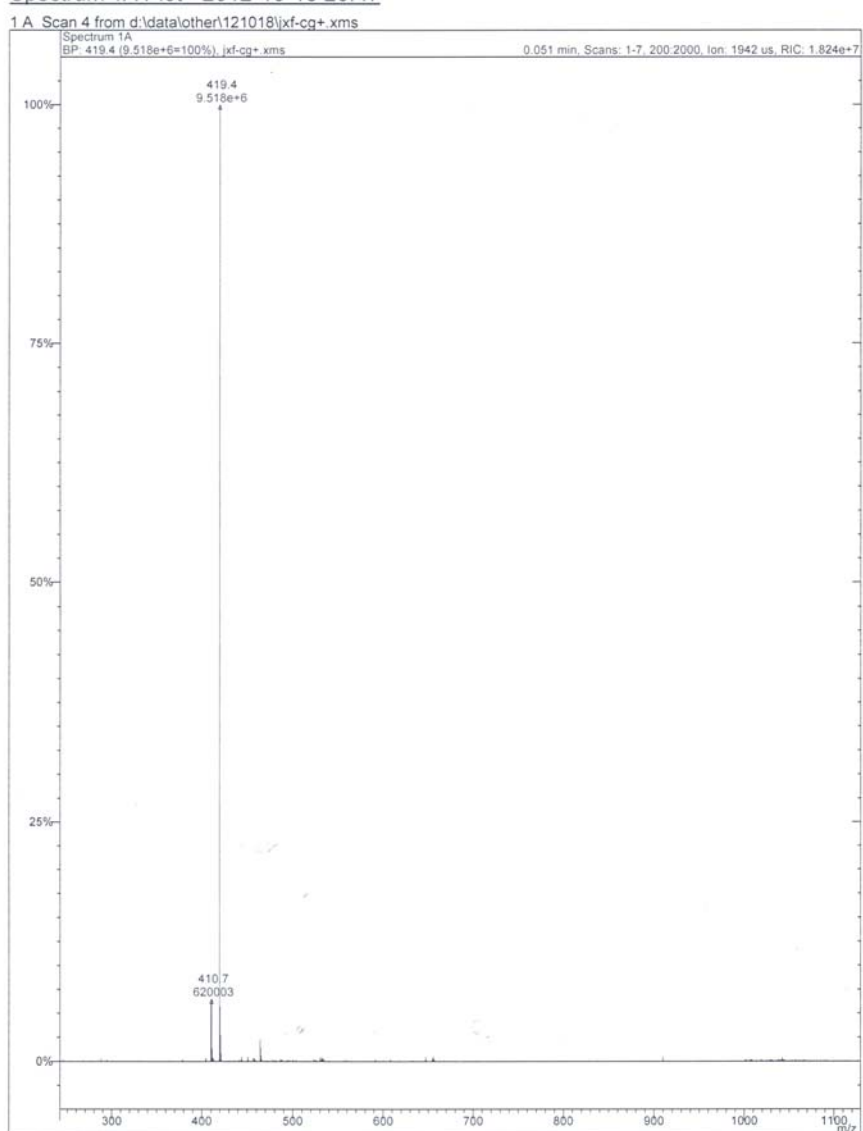

**Fig. S12** Positive electrospray ionization mass spectrum of **2** and **3** in H<sub>2</sub>O, giving strong mass fragments at  $m/z$  419.4 (100%), corresponding to  $[2\text{D}3 - 2\text{NH}_4 - 2\text{Br} + 2\text{H}]^{2+}$ .

7. Partial NOESY NMR spectra of **1** and **3**, **2** and **3** in D<sub>2</sub>O

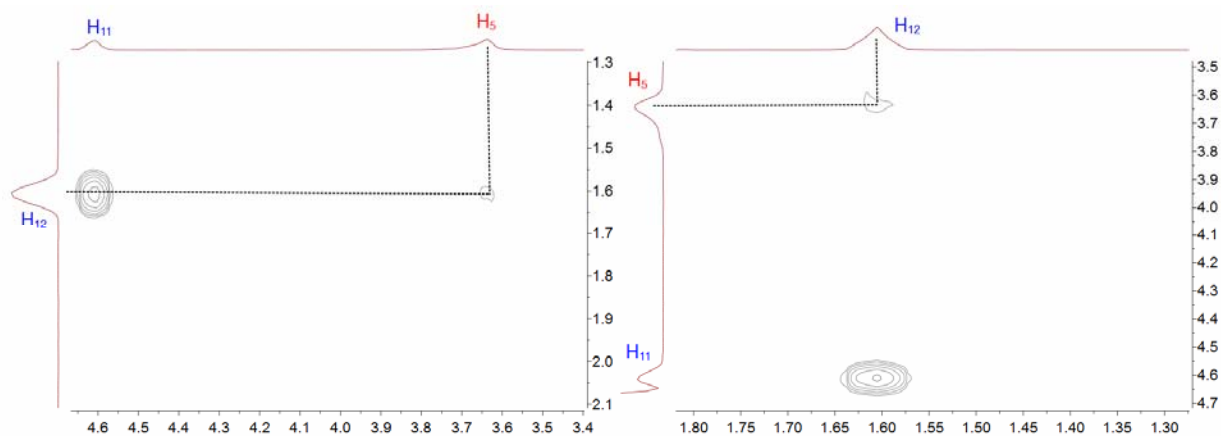

**Fig. S13** Partial NOESY NMR (500 MHz, D<sub>2</sub>O, 298 K) spectrum of a solution of 3.00 mM **1** and **3**.

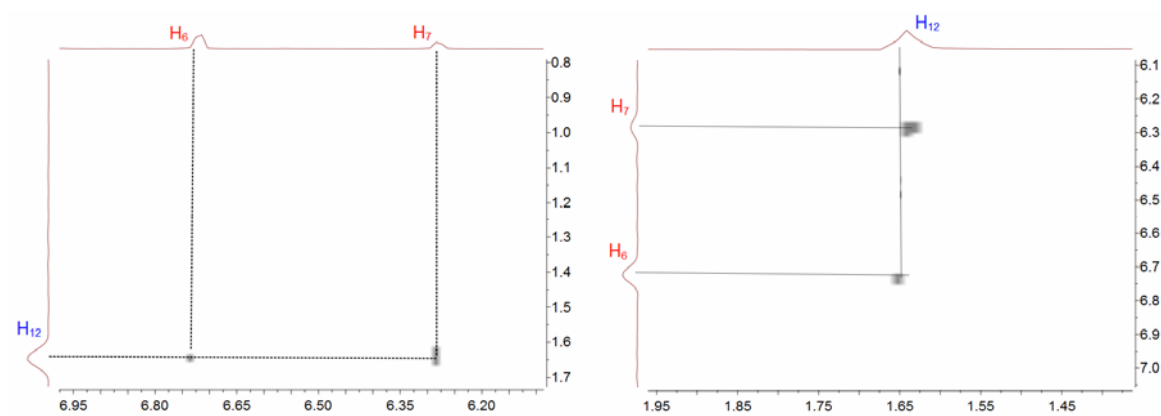

**Fig. S14** Partial NOESY NMR (500 MHz, D<sub>2</sub>O, 298 K) spectrum of a solution of 3.00 mM **2** and **3**.

### 8. Partial $^1\text{H}$ NMR spectra of the pH-controlled complexation between **2** and **3**

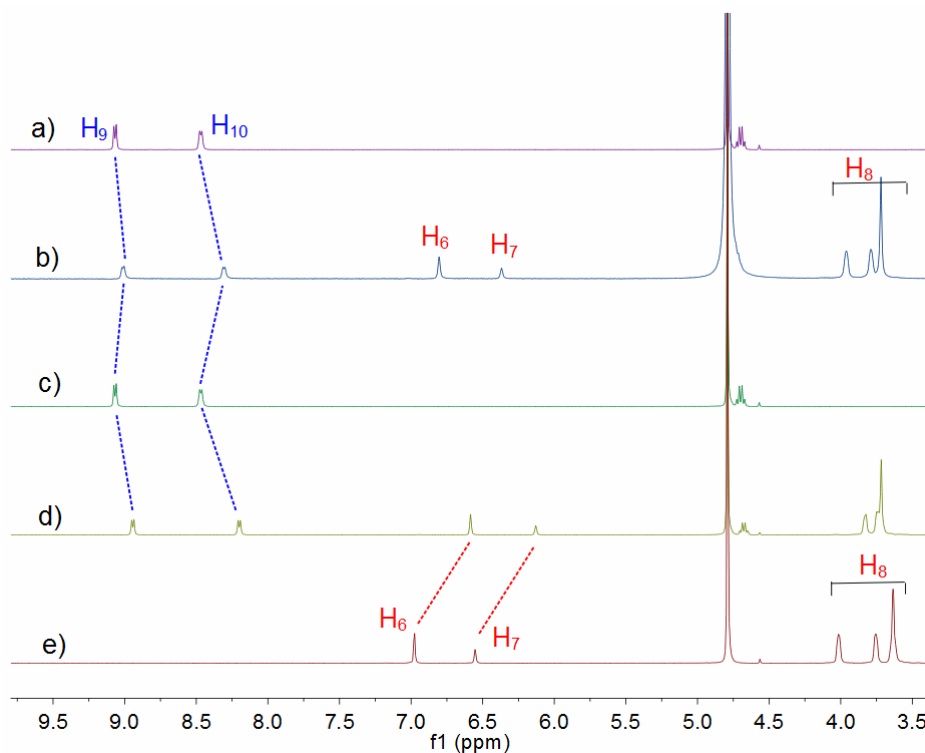

**Fig. S15** Partial  $^1\text{H}$  NMR spectra (400 MHz,  $\text{D}_2\text{O}$ , 298 K): a) **3**; b) a solution of 2.00  $\mu\text{L}$  of aqueous HCl solution, 1.50 mg NaOH, and 0.500 mL of 3.00 mM **2** and **3**; c) a solution of 2.00  $\mu\text{L}$  of aqueous HCl solution and 0.500 mL of 3.00 mM **2** and **3**; d) 3.00 mM **2** and **3**; and e) **2**.

### 9. COSY and NOESY NMR spectra of **1** in $\text{D}_2\text{O}$

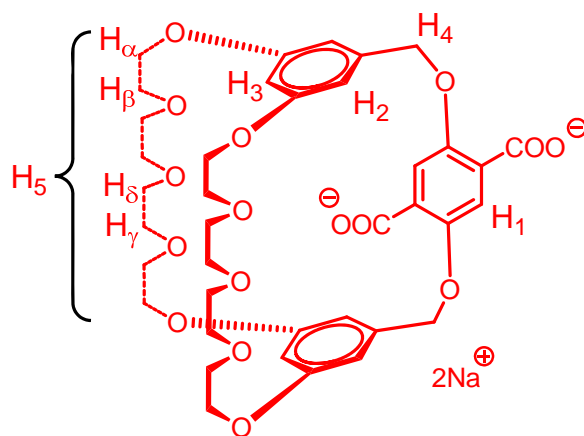

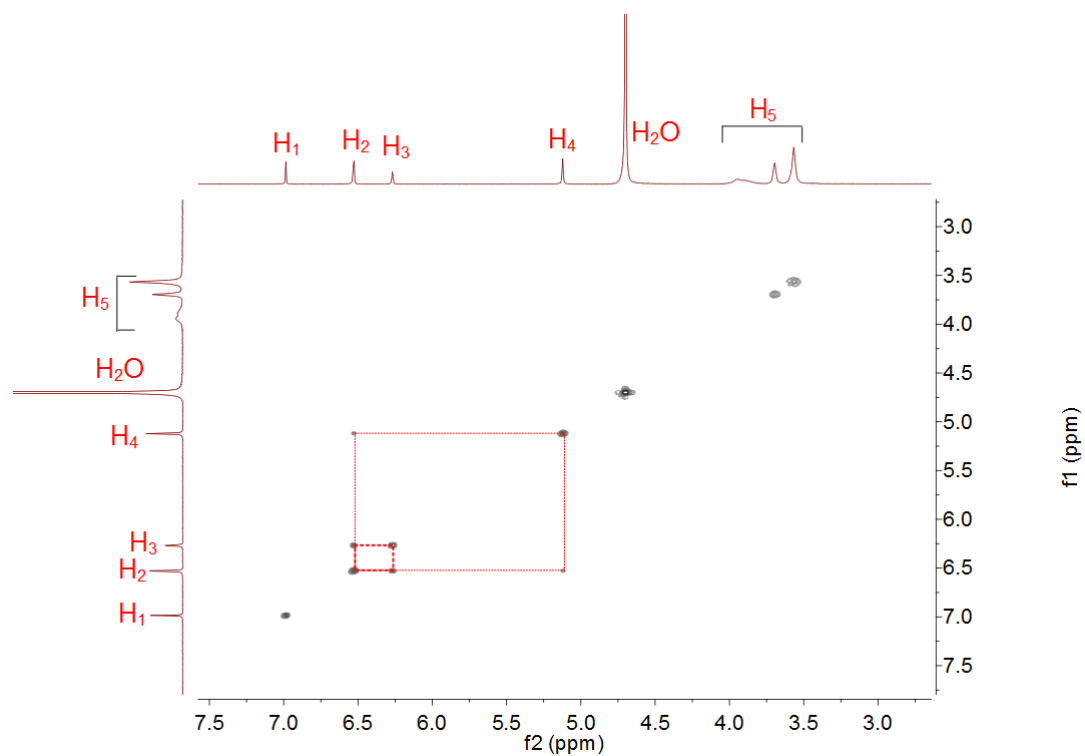

**Fig. S16** COSY NMR (500 MHz, D<sub>2</sub>O, 298 K) spectrum of 3.00 mM **1**. Correlated signals were observed between H<sub>2</sub> and H<sub>3</sub> and between H<sub>2</sub> and H<sub>4</sub> in D<sub>2</sub>O.

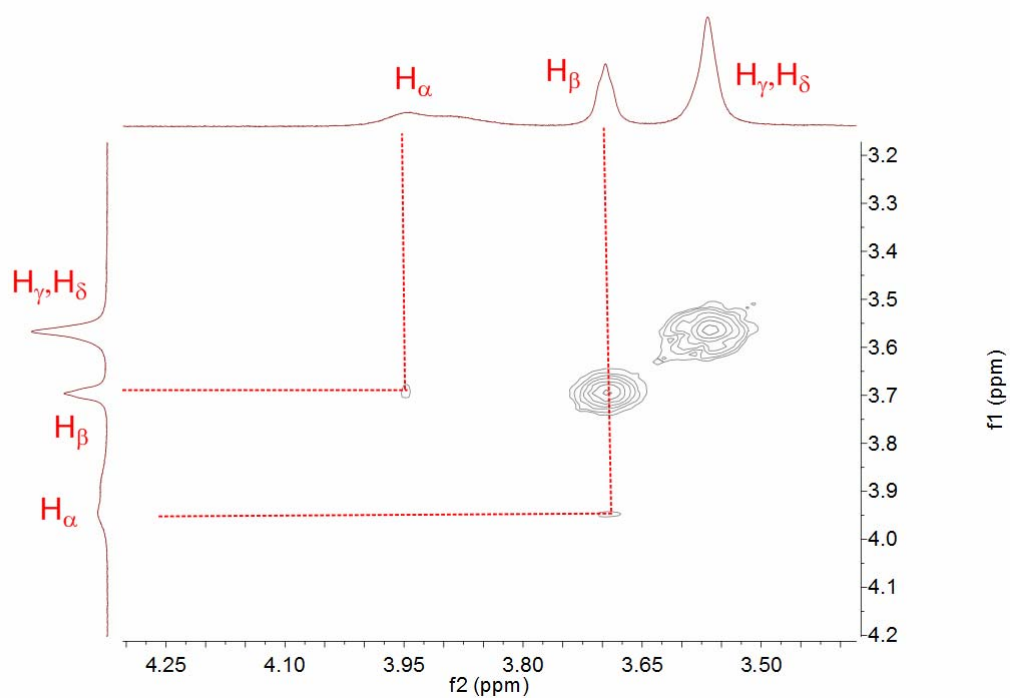

**Fig. S17** Partial COSY NMR (500 MHz, D<sub>2</sub>O, 298 K) spectrum of 3.00 mM **1**. A correlated signal was observed between H<sub>α</sub> and H<sub>β</sub> in D<sub>2</sub>O.

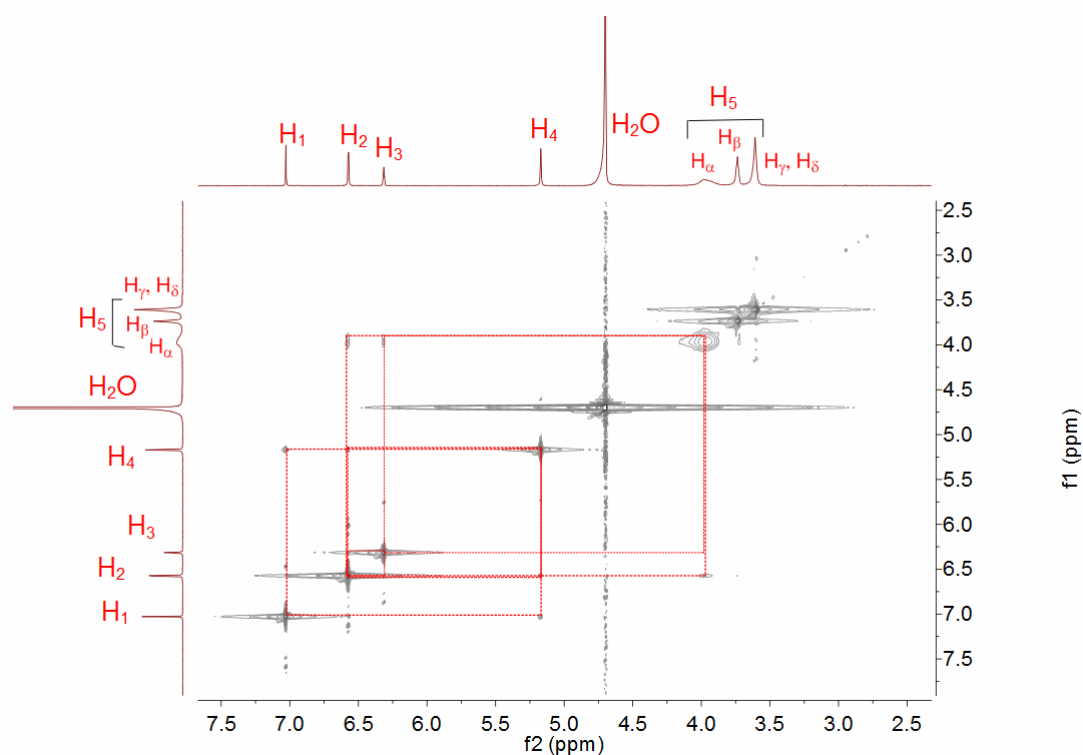

**Fig. S18** NOESY NMR (500 MHz, D<sub>2</sub>O, 298 K) spectrum of 3.00 mM **1**. Correlated signals were observed between H<sub>2</sub> and H<sub>3</sub>, between H<sub>1</sub> and H<sub>4</sub>, between H<sub>2</sub> and H<sub>4</sub>, between H<sub>α</sub> and H<sub>3</sub>, and between H<sub>α</sub> and H<sub>2</sub> in D<sub>2</sub>O.

*References:*

- S1. H. W. Gibson and D. S. Nagvekar, *Can. J. Chem.* 1997, **75**, 1375–1384.
- S2. (a) K. A. Connors, *Binding Constants*; Wiley: New York, 1987; (b) Corbin, P. S. Ph.D. Dissertation, University of Illinois at Urbana-Champaign, Urbana, IL, 1999; (c) P. R. Ashton, R. Ballardini, V. Balzani, M. Belohradsky, M. T. Gandolfi, D. Philp, L. Prodi, F. M. Raymo, M. V. Reddington, N. Spencer, J. F. Stoddart, M. Venturi and D. J. Williams, *J. Am. Chem. Soc.* 1996, **118**, 4931–4951.
